# Supplementary material for: Genome-Wide Dissection of the CRF Gene Family in Brassica napus Indicates that BnaCRF8s Specifically Regulate Root Architecture and Phosphate Homeostasis against Phosphate Fluctuation in Plants
Source: MDPI journal article supplement (doi:10.3390/ijms21103660), 2020-05-22

# Figure S1

**a** CRF domain

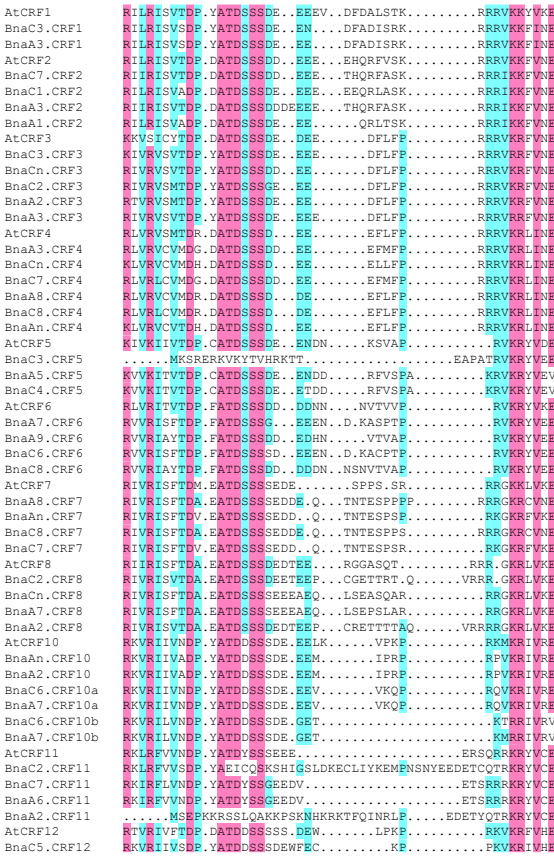

**b** AP2/ERF domain

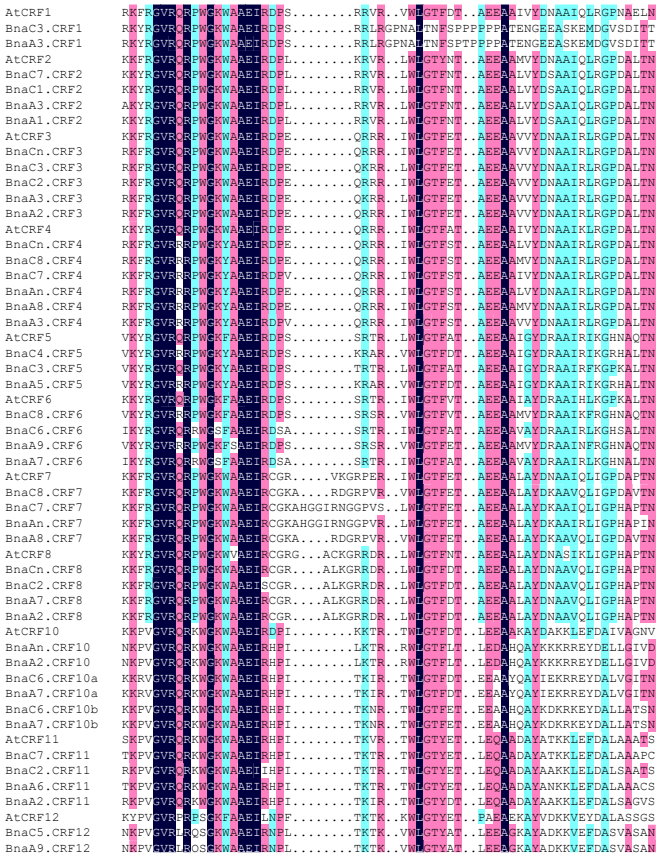

**c** CRF domain

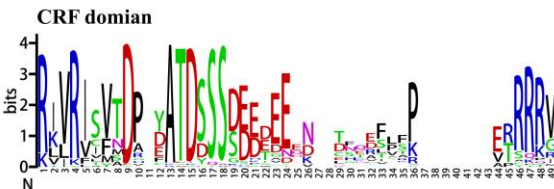

AP2/ERF domain

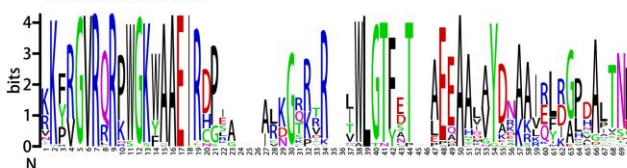

**d**

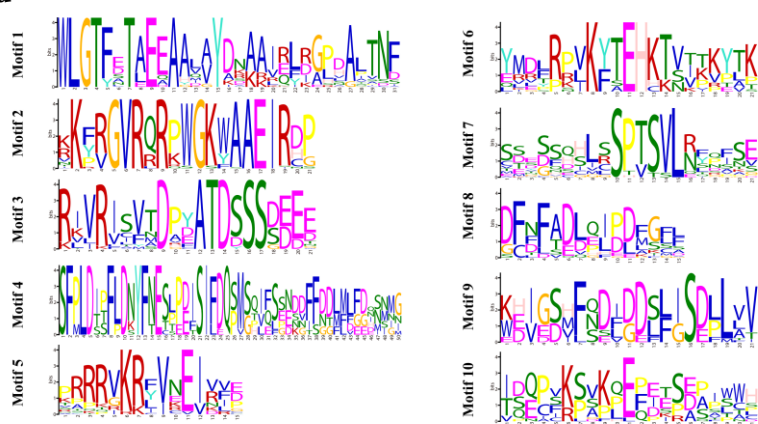

Figure S2

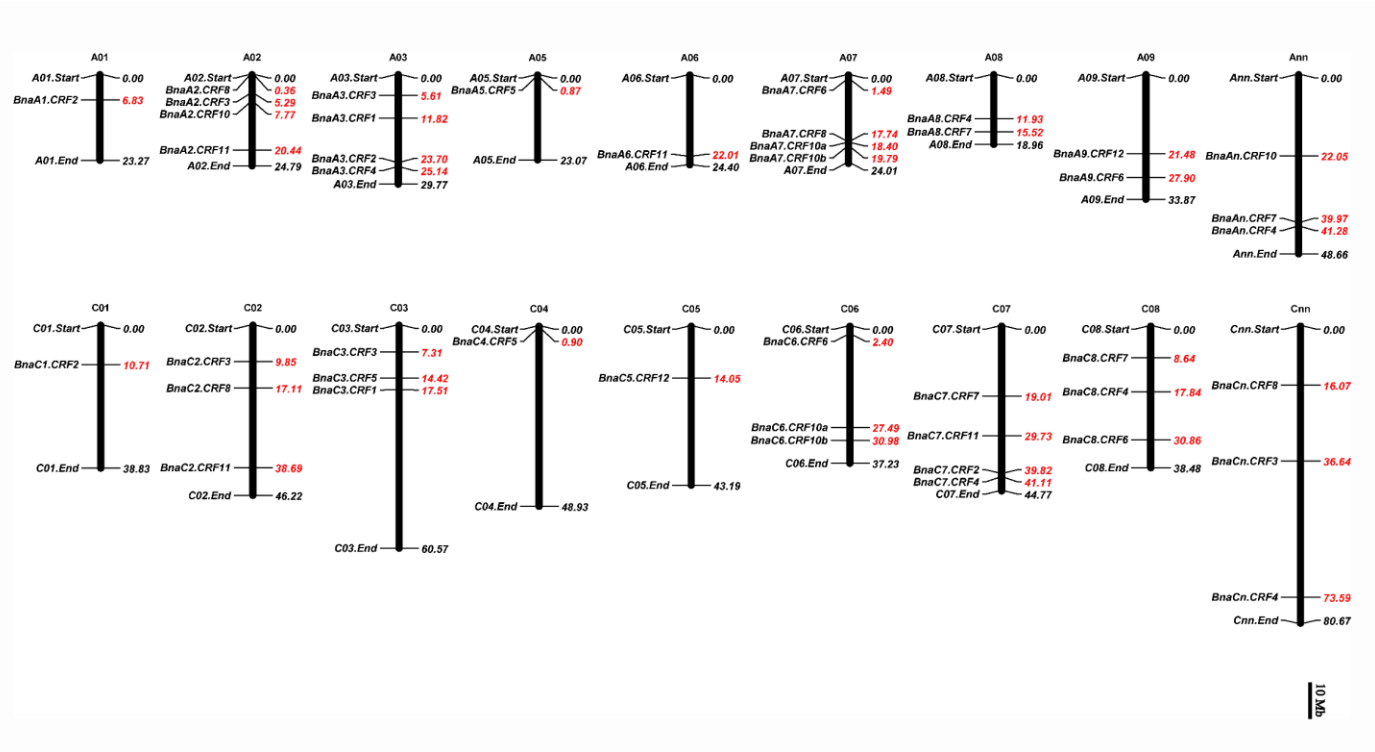

Figure S3

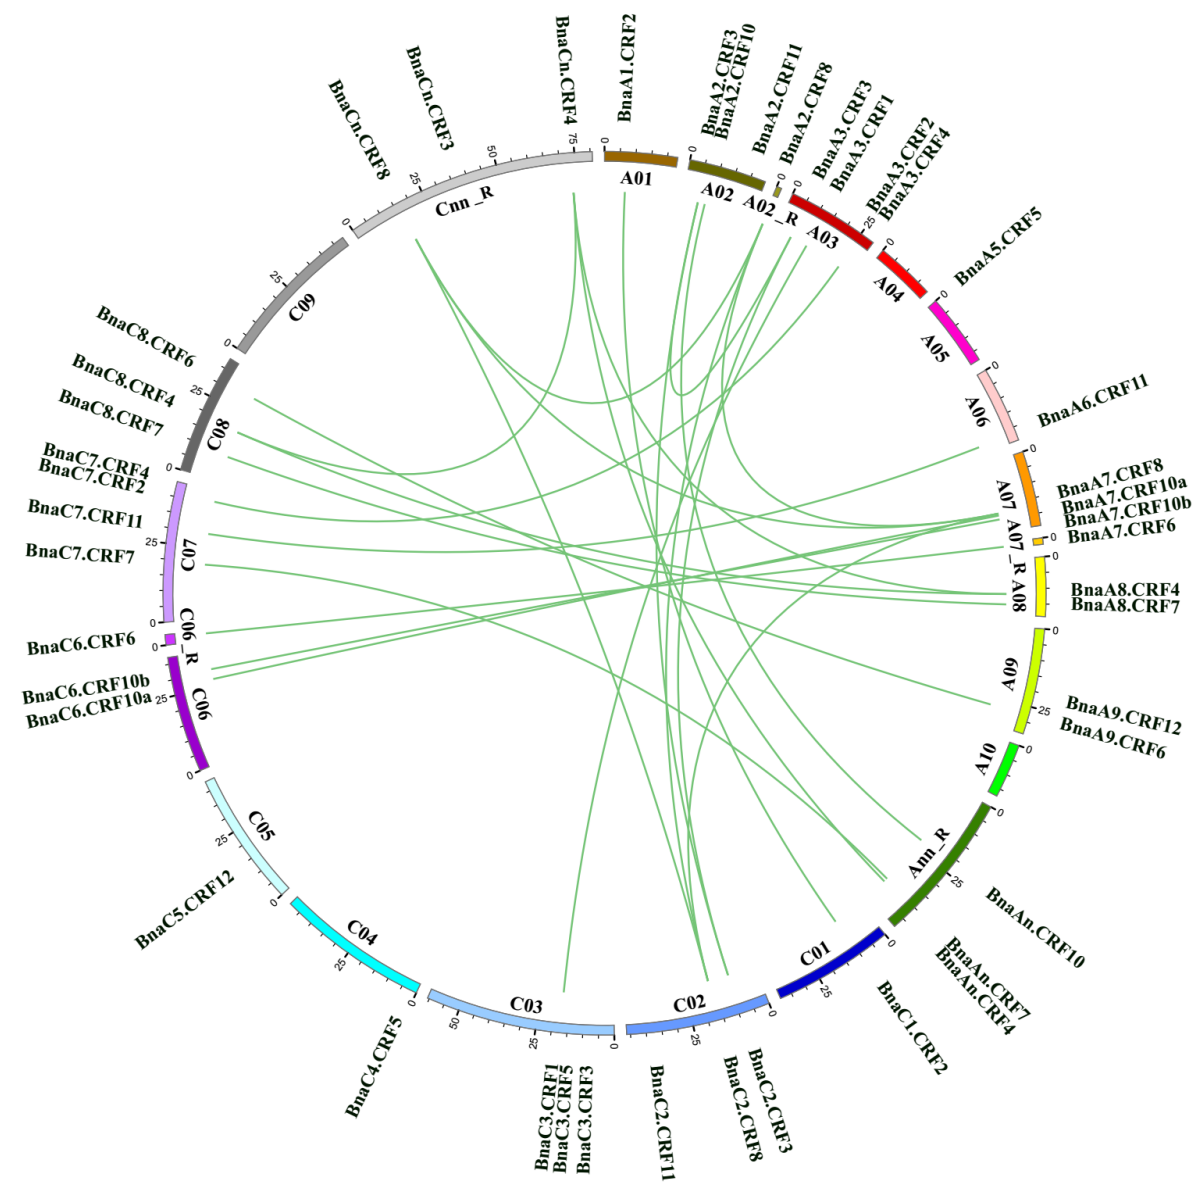

Figure S4

|            |        |  |            |  |            |  |            |  |            |  |            |  |            |  |            |  |
|------------|--------|--|------------|--|------------|--|------------|--|------------|--|------------|--|------------|--|------------|--|
|            | AtCRF8 |  |            |  |            |  |            |  |            |  |            |  |            |  |            |  |
| BnaA2.CRF8 | 75.60  |  | BnaA2.CRF8 |  |            |  |            |  |            |  |            |  |            |  |            |  |
| BnaA7.CRF8 | 77.11  |  | 81.66      |  | BnaA7.CRF8 |  |            |  |            |  |            |  |            |  |            |  |
| BnaC2.CRF8 | 77.58  |  | 92.22      |  | 82.04      |  | BnaC2.CRF8 |  |            |  |            |  |            |  |            |  |
| BnaCn.CRF8 | 77.71  |  | 82.84      |  | 97.58      |  | 82.04      |  | BnaCn.CRF8 |  |            |  |            |  |            |  |
| BraA2.CRF8 | 75.60  |  | 100.00     |  | 82.25      |  | 92.22      |  | 82.84      |  | BraA2.CRF8 |  |            |  |            |  |
| BraA7.CRF8 | 76.51  |  | 79.88      |  | 98.18      |  | 80.84      |  | 95.76      |  | 79.88      |  | BraA7.CRF8 |  |            |  |
| BolC2.CRF8 | 78.66  |  | 94.01      |  | 83.23      |  | 96.95      |  | 83.83      |  | 94.01      |  | 82.04      |  | BolC2.CRF8 |  |
| BolCn.CRF8 | 77.71  |  | 82.84      |  | 97.58      |  | 82.04      |  | 100.00     |  | 82.84      |  | 95.76      |  | 83.23      |  |

Figure S5

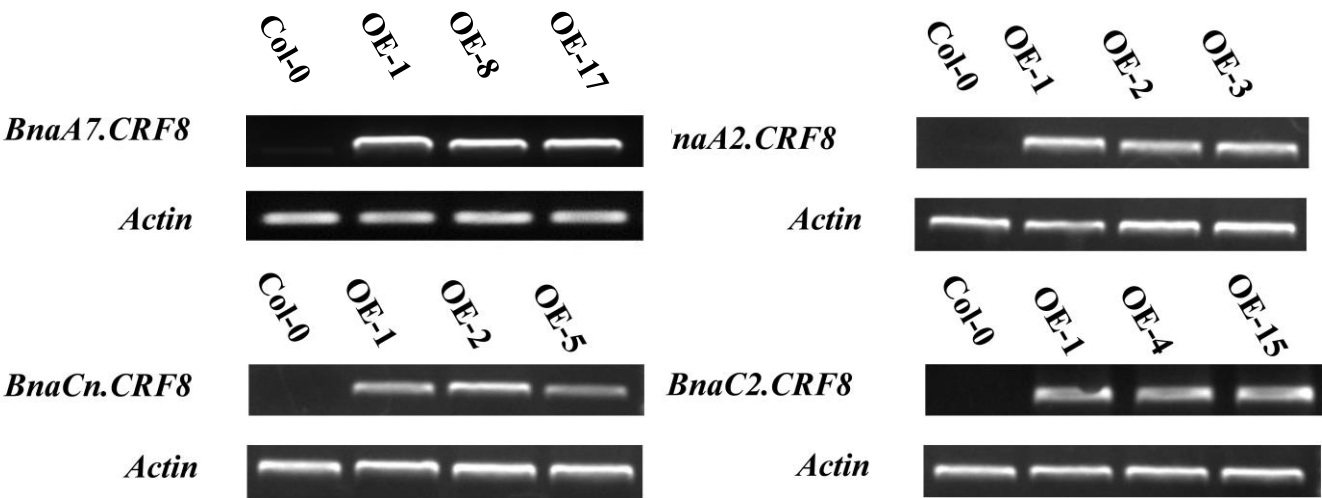

**Figure S6**

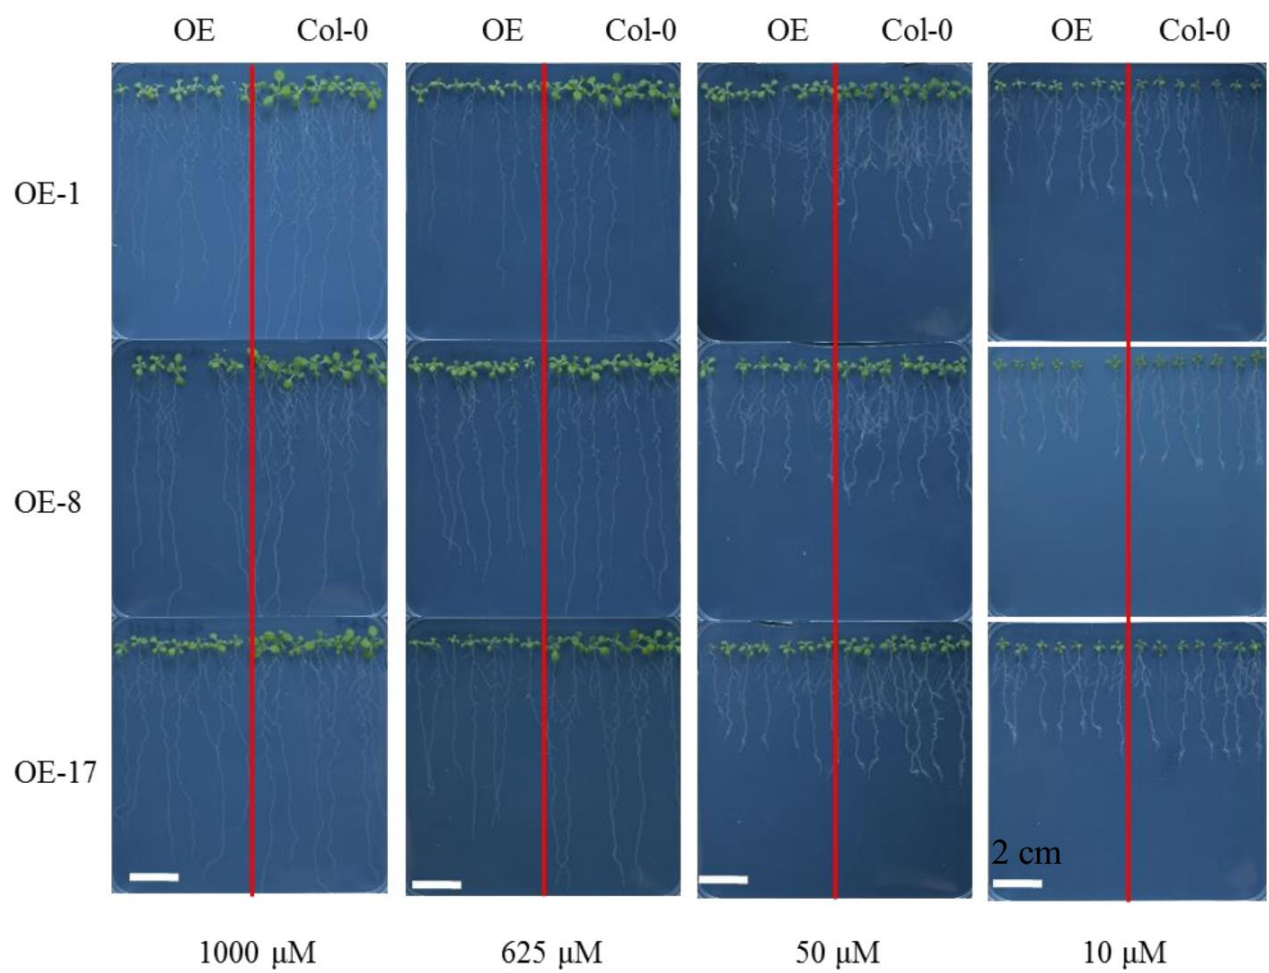

Figure S7

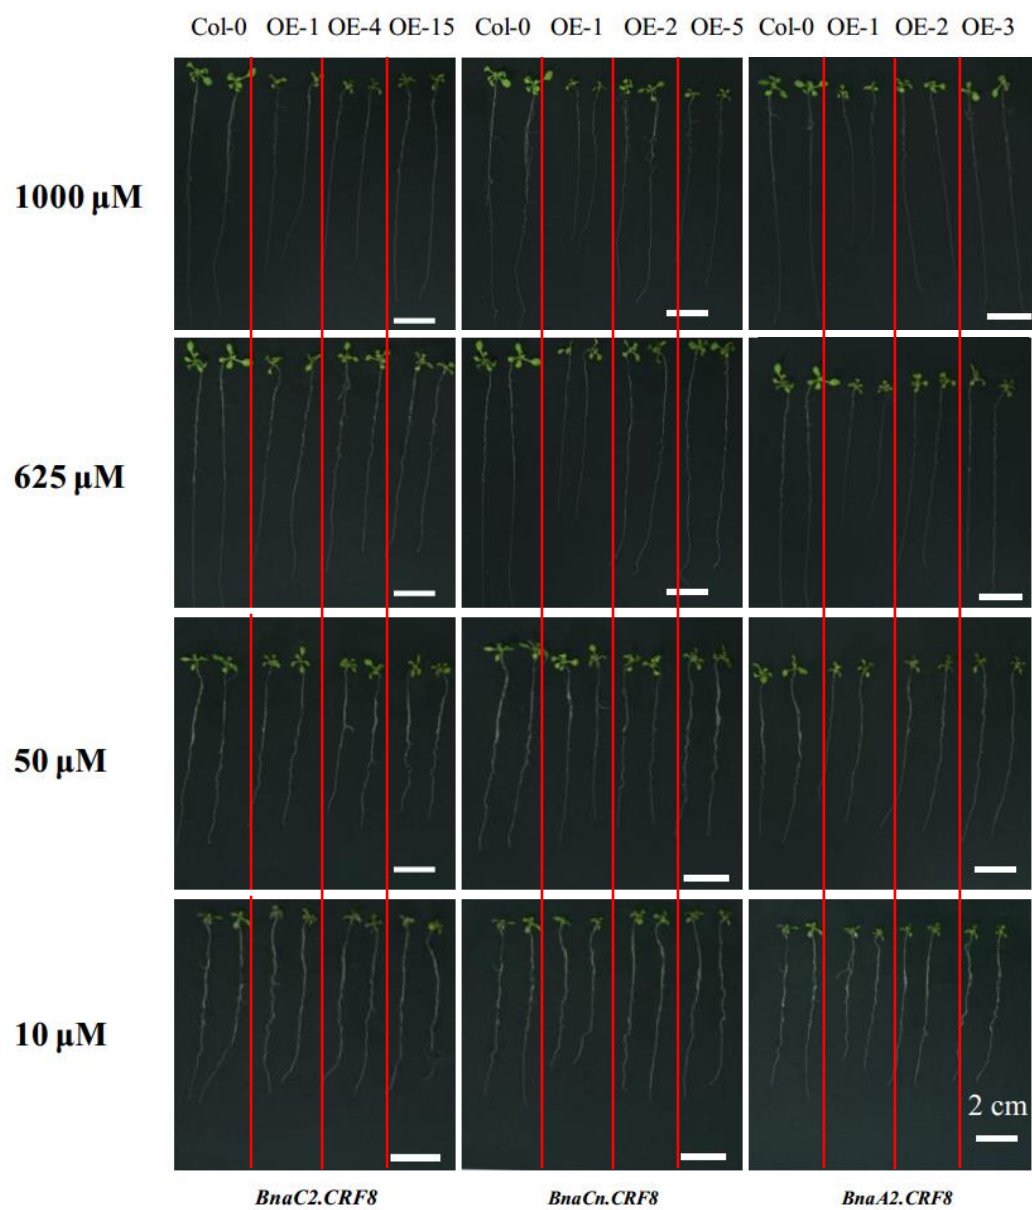

Figure S8

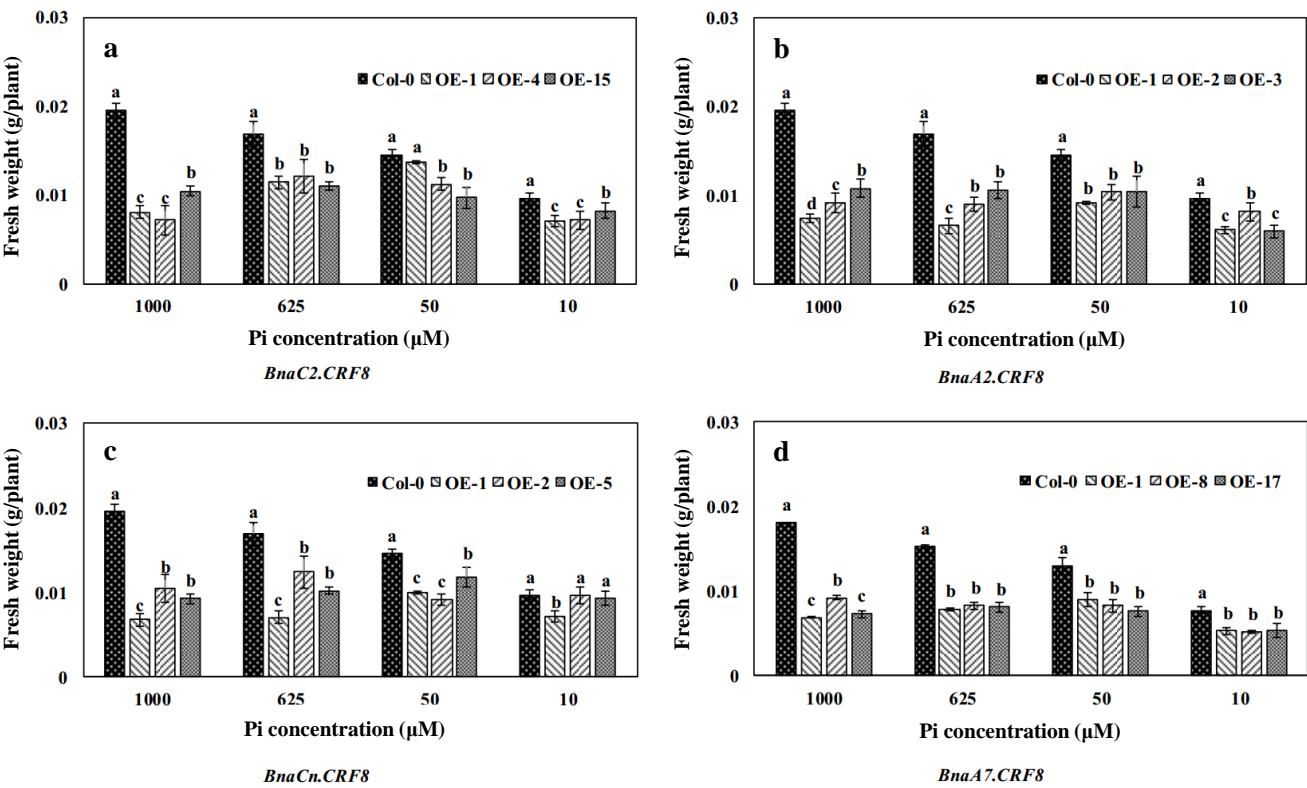

Supplement: s1 [file s1]
